# CRISPR/Cas9-mediated mutagenesis in the sea lamprey *Petromyzon marinus*: a powerful tool for understanding ancestral gene functions in vertebrates

Tyler Square<sup>1,\*</sup>, Marek Romášek<sup>1,\*</sup>, David Jandzik<sup>1,2</sup>, Maria V. Cattell<sup>1,3</sup>, Michael Klymkowsky<sup>4</sup> and Daniel M. Medeiros<sup>1,‡</sup>

## ABSTRACT

Lamprey is one of only two living jawless vertebrates, a group that includes the first vertebrates. Comparisons between lamprey and jawed vertebrates have yielded important insights into the origin and evolution of vertebrate physiology, morphology and development. Despite its key phylogenetic position, studies of lamprey have been limited by their complex life history, which makes traditional genetic approaches impossible. The CRISPR/Cas9 system is a bacterial defense mechanism that was recently adapted to achieve high-efficiency targeted mutagenesis in eukaryotes. Here we report CRISPR/Cas9-mediated disruption of the genes *Tyrosinase* and *FGF8/17/18* in the sea lamprey *Petromyzon marinus*, and detail optimized parameters for producing mutant F0 embryos. Using phenotype and genotype analyses, we show that CRISPR/Cas9 is highly effective in the sea lamprey, with a majority of injected embryos developing into complete or partial mutants. The ability to create large numbers of mutant embryos without inbred lines opens exciting new possibilities for studying development in lamprey and other non-traditional model organisms with life histories that prohibit the generation of mutant lines.

**KEY WORDS:** Lamprey, CRISPR, Vertebrate, Evolution

## INTRODUCTION

The first vertebrates had simple cartilaginous head skeletons that lacked proper joints. Today, only two groups of jawless (agnathan) vertebrates survive: lampreys and hagfish. Comparisons between lamprey, hagfish and jawed vertebrates (gnathostomes) have been used for over a century to identify ancestral vertebrate features and deduce potential gnathostome novelties. However, due to the inaccessibility of hagfish, which live and spawn on the ocean floor (Ota et al., 2007), most studies of agnathan biology have focused on lampreys. Work on lamprey embryos, larvae and adults has provided important insights into the evolution of key vertebrate features including the adaptive immune system (Pancer et al., 2004), the endocrine system (Sower et al., 2009; Close et al., 2010), regenerative capacity (Smith et al., 2011), the head skeleton (McCauley and Bronner-Fraser, 2006) and large-scale gene

duplications (Smith et al., 2013). There is also much interest in understanding lamprey biology with the goal of conserving native lamprey species and controlling invasive lampreys (reviewed by Sower, 2003).

Among lamprey species, the sea lamprey *Petromyzon marinus* has been used extensively to study the evolution of vertebrate development (Beamish, 1980; McCauley and Kuratani, 2008; Piavis, 1971). Several features make the sea lamprey particularly well-suited for such work. During their summer spawning season, large numbers of sexually mature adults can be trapped in shallow freshwater streams. Ripe, captured females can be held and manually stripped of tens of thousands of eggs over the course of several days (Nikitina et al., 2009). Once fertilized, lamprey embryos develop more slowly than most gnathostomes, allowing for fine-grained staging. Lamprey embryos are also similar in size to amphibian embryos, making them amenable to microsurgical grafting, vital dye labeling, and microinjection.

Lamprey embryos have been injected with both synthetic mRNA and DNA to achieve gain-of-function phenotypes and analyze *cis*-regulatory sequences (Parker et al., 2014; Sauka-Spengler et al., 2007). Translation-blocking morpholinos have also been used to test the function of genes involved in early developmental process, such as neural crest specification (McCauley and Bronner-Fraser, 2006; Sauka-Spengler et al., 2007). However, morpholino-mediated gene knockdown is not a permanent perturbation in any organism, making analyses of later developmental functions difficult. This difficulty is pronounced in lampreys given their relatively long developmental time compared with other model vertebrates (~4 days until gastrulation, ~6 days until neural crest migration). Furthermore, the effectiveness of different morpholinos can vary dramatically in lamprey, with a large proportion producing no effect or early embryonic death (Lakiza et al., 2011; Nikitina et al., 2011; Sauka-Spengler et al., 2007) (our unpublished results).

The CRISPR/Cas system is a bacterial immune response mechanism that targets and degrades foreign DNA (Barrangou et al., 2007). Bacteria deploying CRISPR/Cas transcribe RNAs from genomic regions called clustered regularly interspaced short palindromic repeats (CRISPRs), some segments of which correspond to sequences present in pathogenic bacterial viruses. Upon infection, these small RNAs direct sequence-specific cleavage of the viral genome by the CRISPR-associated nuclease Cas9. The specificity of the CRISPR/Cas mechanism has made it a powerful tool for targeted mutagenesis of eukaryotic genomes (Mali et al., 2013). To do this, a synthetic RNA called a guide RNA (gRNA) is designed against a target sequence in the host genome immediately upstream of an endogenous protospacer-adjacent motif (PAM; 5'-NGG-3'). The gRNA is then introduced into the cell

<sup>1</sup>Department of Ecology and Evolutionary Biology, University of Colorado, Boulder, Boulder, CO 80309, USA. <sup>2</sup>Department of Zoology, Comenius University in Bratislava, Bratislava 84215, Slovakia. <sup>3</sup>Department of Pediatrics, University of Colorado, Denver, Aurora, CO 80045, USA. <sup>4</sup>Department of Molecular, Cellular, and Developmental Biology, University of Colorado, Boulder, Boulder, CO 80309, USA. \*These authors contributed equally to this work

<sup>‡</sup>Author for correspondence (daniel.medeiros@colorado.edu)

together with Cas9 mRNA or protein, allowing the Cas9 protein and gRNA to form a complex that finds and cuts the target sequence. Once cleaved by the gRNA-guided Cas9 enzyme, the DNA is repaired by endogenous repair mechanisms, leading to deletions and/or insertions via non-homologous end joining. CRISPR/Cas9 mutagenesis has been successfully applied to several traditional developmental model organisms, including *Drosophila melanogaster* (Bassett et al., 2013), *Mus musculus* (Wang et al., 2013), *Danio rerio* (Hwang et al., 2013), *Xenopus tropicalis* (Guo et al., 2014; Nakayama et al., 2013), nematodes (Lo et al., 2013), sea anemone (Ikmi et al., 2014) and seed plants (Belhaj et al., 2013). Although versatile, CRISPR/Cas9-mediated mutagenesis is not equally efficient in all organisms. Not surprisingly, model vertebrates such as zebrafish and *Xenopus tropicalis* seem to require different concentrations of mRNA and gRNA for efficient F0 gene knockdown (Jao et al., 2013; Guo et al., 2014).

With the aim of improving the tractability of the sea lamprey for developmental genetic studies, we tested the efficacy of the CRISPR/Cas9 system in sea lamprey embryos and larvae. As a proof-of-principle, we targeted two genes with easily scored knockdown phenotypes, but different levels of pleiotropy: *Tyrosinase* (*Tyr*) and *FGF8/17/18*. The enzyme tyrosinase is needed for melanin synthesis in all vertebrates. Successful mutagenesis of the lamprey *Tyr* gene should reduce pigmentation but have no other effects on development. By contrast, gene expression and pharmacological inhibition have shown that the *FGF8/17/18* gene family is involved in several conserved developmental processes, including mesoderm specification, somitogenesis, CNS patterning, pharyngeal segmentation and skeletal differentiation (Abzhanov and Tabin, 2004; Jandzik et al., 2014; Mason et al., 2000; Reifers et al., 1998; Sun et al., 1999). Depending on the timing and penetrance of CRISPR/Cas9-mediated mutagenesis in lamprey embryos, we expected mutation of the single lamprey *FGF8/17/18* homolog to produce a range of phenotypes mimicking the effects of pharmacological FGF signaling inhibition. We found that CRISPR/Cas9-mediated mutagenesis of both genes was highly effective, validating the method in this evolutionarily informative species.

## RESULTS

### *Tyrosinase* expression during sea lamprey development

Lamprey possesses neural crest-derived melanocytes that emerge from the dorsal neural tube around stage (st.) 25.5. The lamprey eye begins depositing melanin as the larva approaches st. 27. At st. 26.5 we observed *Tyr* mRNA expression in presumptive neural crest-derived melanocytes, and in the eye, presaging melanin deposition in the retina (Fig. 1A,B).

### Optimization of *Tyr* mutagenesis

We synthesized two different gRNAs targeting an exon of lamprey *Tyr* homologous to exon 1 of human *TYR*. We then co-injected 500 pg Cas9 with 200 pg *Tyr* gRNA 1 and 200 pg *Tyr* gRNA 2, as described for *Xenopus tropicalis* (Guo et al., 2014). Using these quantities, 37% of larvae displayed an obvious reduction in pigmentation of 10% or more. We then increased the amount of Cas9 mRNA to 1 ng and the amount of gRNA to 400 pg *Tyr* gRNA 1 and 400 pg *Tyr* gRNA 2. While the occurrence of albino or nearly albino larvae was highest with this treatment (59%), we also observed a severe developmental delay or abnormal morphology in 24% of the larvae. We then injected individuals with the same amount of Cas9 mRNA (1 ng), but reduced the gRNA concentration to that of the initial trial (400 pg). This treatment produced a high

frequency of albino/nearly albino (21%) and partially pigmented (44%) larvae, and reduced larval deformity to the level typical for healthy uninjected controls (~5–8%) (Table 1; see Fig. 1D–G for scoring examples).

After determining the highest-tolerated RNA quantities for injection, we sought to test the relative effectiveness of the two *Tyr* gRNAs. We injected zygotes from a single fertilization event with 400 pg of each gRNA singly, along with 1 ng Cas9 mRNA to directly compare the efficiency of each gRNA (g1,  $n=58$ ; g2,  $n=66$ ). After scoring, a Wilcoxon rank-sum test was performed to test for differences in the ability of each of these gRNAs to produce a mutant phenotype; this resulted in a  $P$ -value of 0.7865, indicating that their activity is very similar. Prior to scoring, deformed embryos were removed from this experiment only.

To verify disruption of the *Tyr* locus, two nearly albino individuals injected with *Tyr* gRNA 1 and two nearly albino embryos injected with *Tyr* gRNA 2 were pooled and genotyped. Of the seven unique alleles observed, one was wild type, five contained a deletion, and one contained both a deletion and an insertion (Fig. S2A). To look for a correlation between the prevalence of mutant alleles and the phenotype generated, we genotyped an individual positive for the lineage tracer LRD from each of the four mutant categories (Fig. 2). We found that the individual that appeared to have a wild-type level of pigmentation (but was LRD positive) displayed 0/14 mutated sequences, the individual showing ~25% reduction in pigmentation had 5/13 mutant alleles (two of which were frameshifts), the individual with ~75% reduction in pigmentation showed 9/10 mutant alleles (five of which were frameshifts), and the completely albino individual showed 13/13 mutant alleles (nine of which were frameshifts).

Recently, Cas9 protein has become commercially available. To test whether an injection solution using Cas9 protein instead of mRNA is capable of generating a higher frequency of mutant lamprey, we injected 400 pg *Tyr* gRNA 2 in combination with 1 ng Cas9 protein. This resulted in an astounding 99% completely albino individuals (173/174), but a higher proportion (12%) of developmentally perturbed lamprey (21/174).

### Mutagenesis of *FGF8/17/18*

As with *Tyr*, we found that injection of 1 ng Cas9 mRNA and 800 pg *FGF8/17/18* gRNA caused high mortality. However, at lower RNA concentrations (500 pg Cas9 mRNA, 400 pg total gRNA), survival was similar to that of uninjected sibling controls, and surviving embryos displayed phenotypes consistent with *FGF8/17/18* loss of function (Jandzik et al., 2014; Reifers et al., 1998; Crump et al., 2004). The earliest and most common mutant phenotype was a reduction in head size (Table 2, Fig. 3). This effect was observed at a high frequency in embryos injected with Cas9 mRNA and either *FGF8/17/18* gRNA alone or in combination (*FGF8/17/18* gRNA 1+gRNA 2). A Wilcoxon rank-sum test revealed that these gRNAs differ significantly in their ability to produce a mutant phenotype (g1,  $n=170$ ; g2,  $n=224$ ;  $P=0.0108$ ). Mutant scores for each gRNA can be seen separately in Table 2.

To verify that animals displaying these phenotypes were alive and injected rather than exhibiting autofluorescence due to cell death, we documented the relative brightness on both GFP and LRD absorption channels. Dead embryos fluoresced more strongly on the GFP channel than injected embryos, whereas they fluoresced less strongly on the LRD channel (Fig. S3). This supports the idea that these strong, consistent phenotypes that were observed are due to actual genetic perturbations rather than a termination of development.

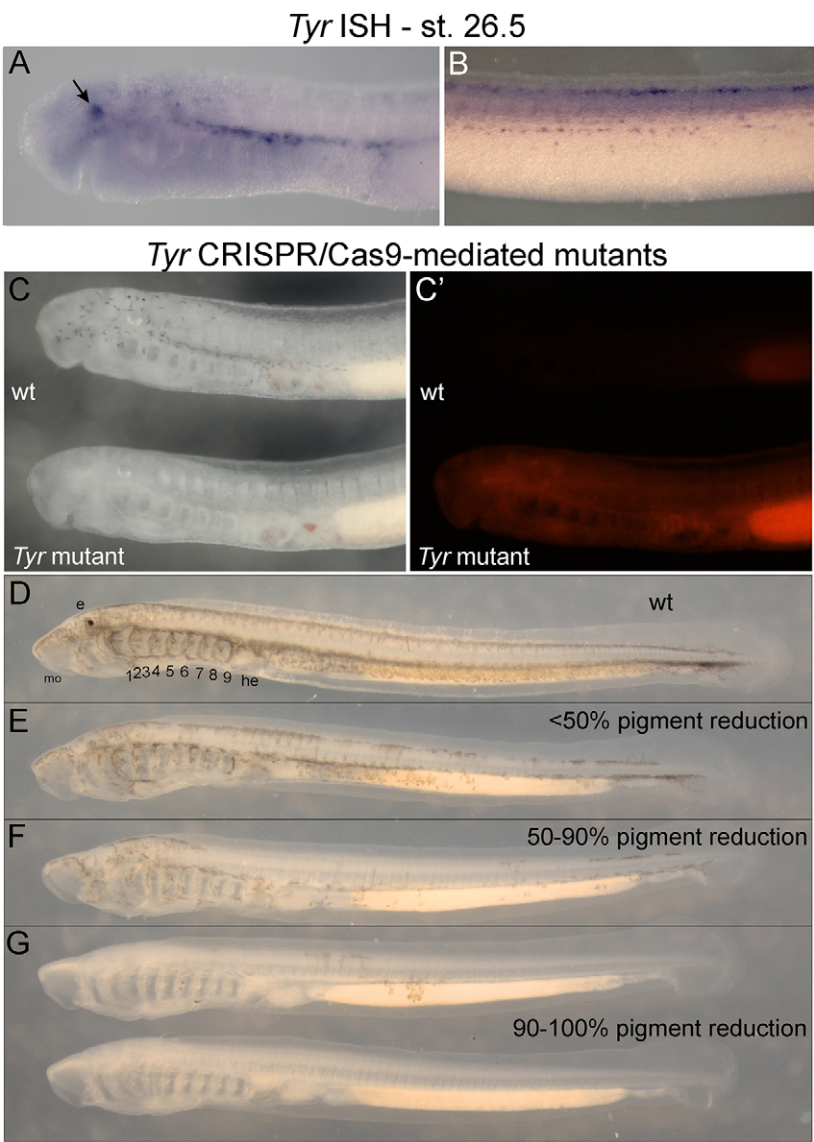

**Fig. 1. *Tyr* expression and disruption via CRISPR/Cas9.** Lateral views with anterior to left in all panels. (A) A st. 26.5 sea lamprey larva showing *Tyr* expression in neural crest-derived melanocytes near the pharynx and retinal expression in the presumptive eye (arrow). (B) Lateral flank view of a st. 26.5 larva showing neural crest-derived melanocytes in the dorsal neural tube and on the dorsal surface of the yolk. (C,C') Brightfield (C) and red channel fluorescence (C') images showing the absence of pigment cells in an embryo that is positive for the LRD lineage tracer. (D-G) Example larvae of each mutant class at st. 30. Pharyngeal arches are labeled by number (1-9); e, eye; he, heart; mo, mouth; wt, wild type.

We further analyzed *FGF8/17/18* gRNA+Cas9 mRNA-injected embryos and larvae for changes in gene expression by *in situ* hybridization (Figs 4 and 5). We examined three genes known to be dependent on FGF signaling in lamprey and gnathostomes: *Engrailed* (*Eng*), which is expressed in the midbrain-hindbrain boundary (Reifers et al., 1998); *Ednra*, an Endothelin receptor expressed in post-migratory neural crest cells (Jandzik et al., 2014); and *SoxE1*, a *soxE* ortholog that marks prechondrocytes (Jandzik et al., 2014; McCauley and Bronner-Fraser, 2006). We also looked at the expression of *Mef2*, a marker of formed somites and pharyngeal mesoderm, to monitor somitogenesis and pharyngeal segmentation

(Jandzik et al., 2014). Consistent with previous reports, expression of *Eng* (Fig. 4), *Ednra* (not shown) and *SoxE1* (Fig. 5A-D) was lost or reduced in presumptive *FGF8/17/18* mutants, while *Mef2* expression revealed a loss of somites and disruptions in somite patterning, as seen in the zebrafish *fgf8* mutant *acerebellar* (Reifers et al., 1998) (Fig. 5E-K). *Mef2*, *Ednra* and *SoxE1* expression in the pharyngeal arches also revealed a loss of pharyngeal segmentation, a consequence of *FGF8/17/18* loss of function in both gnathostomes and lamprey (Jandzik et al., 2014; Reifers et al., 1998; Crump et al., 2004). Occasionally, these disruptions were unilateral, presumably resulting from localization of the injection solution to one of two

**Table 1. Mutagenesis efficiency (% affected) versus deformities (%) of *Tyr* gRNA and Cas9 mixtures**

| Injection mix                                        | 0-10% affected | 10-50% affected | 50-90% affected | >90% affected | Total deformed |
|------------------------------------------------------|----------------|-----------------|-----------------|---------------|----------------|
| 500 pg Cas9 mRNA, 400 pg gRNA 1+2 (n=226)            | 66             | 14              | 13              | 7             | 5              |
| 1 ng Cas9 mRNA, 400 pg gRNA 2 (n=231)                | 35             | 24              | 20              | 21            | 6              |
| 1 ng Cas9 mRNA, 800 pg gRNA 1+2 (n=301)              | 16             | 13              | 12              | 59            | 24             |
| 1 ng Cas9 mRNA, 400 pg negative control gRNA (n=218) | 100            | 0               | 0               | 0             | 6              |
| 1 ng Cas9 protein, 400 pg gRNA 2 (n=174)             | 0              | 0               | 1               | 99            | 12             |





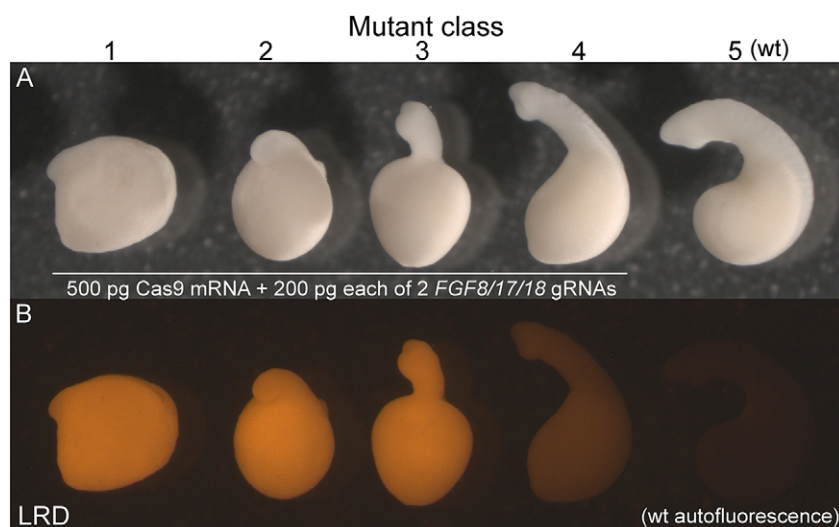

**Fig. 3. Mutant classes used for phenotypic analysis of *FGF8/17/18* CRISPR/Cas9-mediated mutants.**

(A) Brightfield image of sibling lamprey embryos. These example embryos of classes 1–4 were injected with 500 pg Cas9 mRNA and 200 pg each of two *FGF8/17/18* gRNAs. The embryo of class 5 is uninjected. (B) Red channel fluorescence showing LRD deposition in embryos. See Table 2 for information on the distribution of observed mutant classes in *FGF8/17/18* experiments.

## DISCUSSION

Sea lampreys take 7–15 years to mature, can grow to almost 1 m in length, and require large, live prey as adults. As a result, the establishment of mutant or transgenic lines of this species is a practical impossibility. Here we present a proof-of-principle application of CRISPR/Cas9-mediated mutagenesis in the sea

lamprey. Using our optimized parameters, we found that a majority of injected 'F0' embryos develop into complete or partial mutants with reproducible phenotypes and minimal confounding side effects. Remarkably, this efficiency approached 100% when using purified Cas9 protein in the injection mixture. The ability to generate large numbers of genotype-verifiable mutant F0 larvae from the embryos of wild-caught adults opens exciting new possibilities for studying the genetic bases of development in this phylogenetically important species.

Our study suggests that the sea lamprey has a combination of features that make it well-suited to CRISPR/Cas9-based genetic manipulation. Like amphibian embryos, sea lamprey embryos are easy to inject and can tolerate large quantities of synthetic RNA and protein. Having more Cas9 protein and gRNA per cell not only increases mutagenesis efficiency, but opens up the possibility of mutagenizing multiple genes simultaneously. We also found that the nucleotide composition of the lamprey genome makes it relatively easy to design multiple, high-quality gRNAs for a given target exon. The most effective CRISPR gRNAs have a GC content of over 50% (Doench et al., 2014; Gagnon et al., 2014), and all target sites must incorporate a 3' PAM signal (5'-NGG-3'). Because of this, genes that are very AT rich can lack appropriate target sites near PAM motifs. Sea lamprey exons have an average GC content of 61% (Smith et al., 2013). As a result, a typical lamprey exon will have several potential CRISPR/Cas9 target sites near PAM signals. This permits multiple gRNAs to be designed against a single target exon and co-injected, mitigating potential variation in the effectiveness of individual gRNAs. Having multiple gRNAs per gene also provides opportunities to control for off-target phenotypes. For example, if two or more different gRNAs (or gRNA cocktails) targeting the same gene have the same effect on development, it can be safely assumed that the phenotype is specific to the gene, even before genotyping.

Although the lamprey genome lends itself to CRISPR/Cas9-mediated manipulations, we did encounter some challenges with the current publicly available assemblies. Owing to large sequence gaps, many sea lamprey genes identified as cDNAs, or through transcriptome sequencing, are not present in the current version of the genome. Because the exon structure is unknown, CRISPR target sites for these genes run the risk of spanning exons and thus not being contiguously represented in the genome (which is required for recognition by the Cas9/gRNA complex). Fortunately, exon structure tends to be strongly conserved across animals (Rogozin et al., 2003) and thus the risk of spanning exons can be reduced by

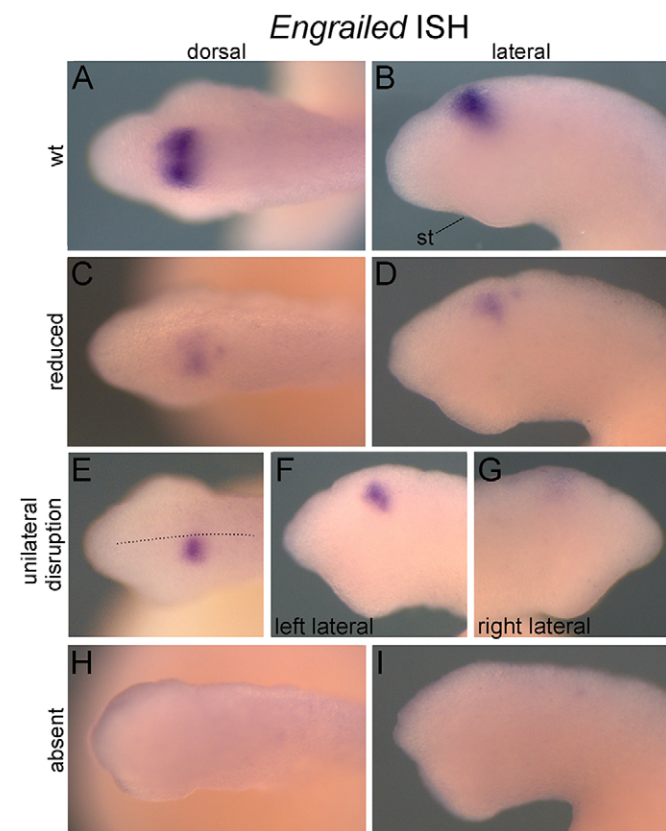

**Fig. 4. *Eng* ISH on *FGF8/17/18* CRISPR/Cas9-mediated mutants at st. 23.** Anterior is to the left in all panels except G, where it is to the right. (A,B) Wild-type *Eng* expression in the midbrain-hindbrain boundary of a control embryo. (C–I) *Eng* expression in *FGF8/17/18* CRISPR/Cas9-mediated mutants. Reduction (C,D), unilateral disruptions (E–G), and total absence (H,I) of *Eng* expression were all observed (see Table 2 for counts). The dotted line (E) indicates the dorsal midline. st, stomodeum.



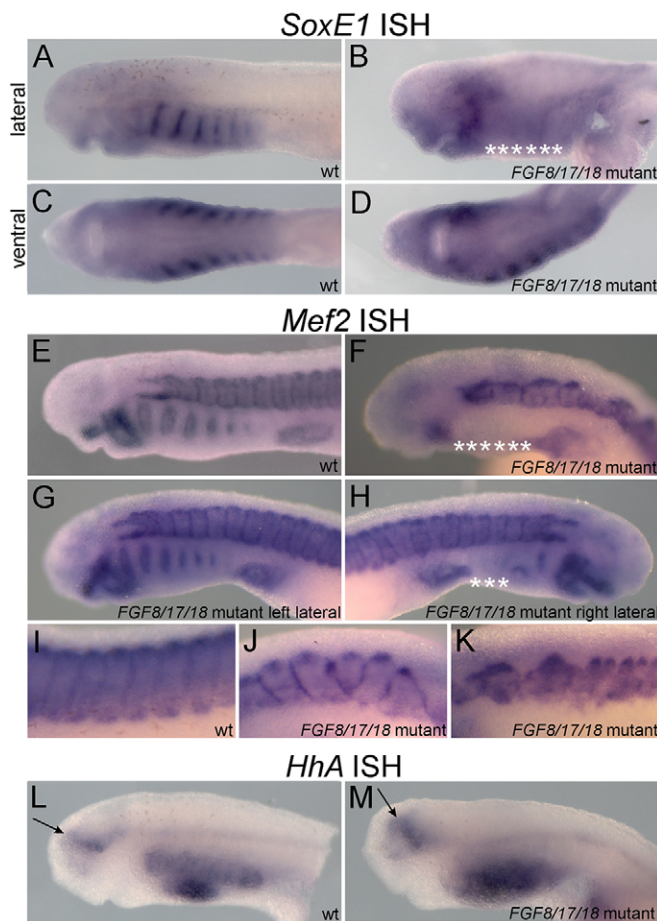

**Fig. 5. *SoxE1*, *Mef2* and *Hha* ISH on *FGF8/17/18* CRISPR/Cas9-mediated mutants.** Anterior is to the left in all panels except H, where it is to the right. (A–D) *SoxE1* ISH on wild-type (A, C) and *FGF8/17/18* CRISPR/Cas9-mediated mutant (B, D) larvae. (B) A unilateral disruption of *FGF8/17/18* resulted in the loss of *SoxE1* expression in the posteriormost six pharyngeal arches (asterisks). (E–K) *Mef2* ISH on wild-type (E) and *FGF8/17/18* CRISPR/Cas9-mediated mutant (F–K) larvae. (F) Some highly affected mutant larvae showed a complete loss of pharyngeal arch *SoxE1* expression (asterisks). (G, H) Some moderately affected mutant larvae showed a unilateral disruption of *Mef2* expression in pharyngeal pouch mesoderm (asterisks in H). (I–K) *Mef2* also revealed somite shape and spacing, which was sometimes slightly disrupted (J) or highly disrupted (K) compared with wild type (I). (L, M) *Hha* ISH on a wild-type larva (L) and a presumed *FGF8/17/18* CRISPR-mediated mutant larva (M), both of which show proper expression of *Hha* in the zona limitans intrathalamica (arrows), indicating that this organization center has, as expected, remained unperturbed.

focusing on evolutionarily conserved exons. The incomplete genome also makes it impossible to scan for all potential off-targets, as is becoming standard practice for other model organisms. These issues should be resolved with future versions of the lamprey genome assembly.

A perennial challenge for understanding the function of developmental regulatory genes is that many are highly pleiotropic. In genetic model systems, strategies for temporally or spatially restricting expression of Cas9 enzyme or gRNA have been proposed as a way to circumvent this problem. We targeted the highly pleiotropic gene *FGF8/17/18* to get a sense for how this issue might affect the creation and scoring of sea lamprey mutants. We found that although a large percentage of CRISPR/Cas9-mediated *FGF8/17/18* mutants appeared to be near-complete nulls, many others had milder phenotypes consistent with mosaics or

hypomorphs, frequently displaying unilateral disruptions in FGF-dependent processes. This difference in penetrance corresponded well to the intensity of lineage tracer fluorescence in the mutant embryos (Fig. 3), as reported in axolotl (Flowers et al., 2014). Going forward, sorting mutants according to lineage tracer intensity and distribution should allow researchers to separate and score complete versus partial mutant embryos. In addition, it should be possible to intentionally restrict CRISPR/Cas9 activity to particular embryonic domains by injecting single blastomeres at later cleavage stages (i.e. 8- or 16-cell stage). One strategy for this would be to inject Cas9 mRNA or protein into zygotes, followed by gRNA injection at later cleavage stages. Although there is no modern developmental fate map for lamprey, lamprey embryos are easy to inject, and thousands can be injected by a single worker each hour. Co-injections of gRNA with a lineage tracer should allow selection of embryos and larvae with the gRNA restricted to the desired tissue, facilitating the study of highly pleiotropic developmental regulators.

In this study, a pair of gRNAs designed against *FGF8/17/18* showed different levels of activity, whereas the pair designed against *Tyr* did not. Variation in gRNA efficiency is well-documented (Hsu et al., 2013) and is likely to be due to the specific binding properties of each RNA. Individual genotyping of *Tyr* mutants revealed that there is likely to be a correlation between the number of mutated *Tyr* sequences and the level of albinism observed in a given individual (Fig. 2), although a true test of this would require much more genotyping of many more individuals. Furthermore, *Tyr* disruptions using gRNA 1 yielded up to 99% albino individuals when used in combination with the protein (see Table 1), suggesting that the targeted region of tyrosinase is catalytically important, such that a frameshift is not required to hinder melanin synthesis. If a frameshift were required, we would at best still expect ~1/3 of all pigment cells in a given batch of larvae to retain proper melanin deposition.

## MATERIALS AND METHODS

### Lamprey spawning and husbandry

Adult spawning phase *P. marinus* were supplied by Hammond Bay Biological Station (Millersburg, MI, USA) in spring and kept in holding tanks until fully ripened. Eggs and sperm were stripped manually from ripe adults (Nikitina et al., 2009). For *Tyr* and *FGF8/17/18* gRNA injections, six and seven different females, respectively, were used during eight and ten different fertilization events, respectively. Sperm from two to four males was typically combined per fertilization event, although some fertilization events had a single sire. Embryos and larvae were kept at 17–18°C either in a closed, recirculating system, or in single 0.5–1 liter dishes containing deionized water supplemented with 400–600 ppm artificial sea salt. Water was changed as necessary, and dead embryos were removed from each dish every day to prevent contamination. Staging was performed according to Tahara (1988). Injected embryos (including negative controls) typically exhibited a slight developmental delay; to account for this delay, all staging was performed based on morphological landmarks of unaffected embryos rather than actual age (usually resulting in a 0.5–1 day delay in fixation compared with wild-type siblings).

### Identification and cloning of *P. marinus Tyr*

Using gnathostome tyrosinase protein sequences as a query, we searched the March 2007 *P. marinus* genome assembly for a *Tyr* homolog (Smith et al., 2013). We identified four putative *Tyr* exons on contig 46507, amplified one of these by PCR, and ligated it into the pJet1.2 vector (Thermo Fisher Scientific). Orthology of the protein encoded by this exon to gnathostome tyrosinase was confirmed by alignment and phylogenetic analysis using the maximum likelihood method in the software package MEGA6 (Tamura et al., 2013) (Fig. S1). The corresponding sequence was deposited in GenBank (accession number KR150760).

## RNA design and synthesis

Human codon-optimized *Streptococcus pyogenes* Cas9 mRNA (Cong et al., 2013) was transcribed as previously described (Guo et al., 2014). After digestion with DNase, unincorporated nucleotides were removed using a Sephadex G-50 column (GE Healthcare). The mRNA was further purified by phenol/chloroform extraction and precipitation as per standard procedures. Precipitated mRNA was resuspended in RNase-free water for injection.

CRISPR/Cas9 target sites with the sequence 5'-GG(18N)NGG-3' were chosen based on three criteria: (1) 50–80% GC content; (2) maximal proximity to the presumptive start codon; and (3) no off-target matches to the known *P. marinus* genome or EST databases showing more than 80% similarity by BLAST, or with fewer than three mismatches in the ten bases proximal to the PAM sequence. The sequences of all target sites are listed in Table S1. Complementary oligonucleotides (Life Technologies) corresponding to the selected genomic target sequences and containing 4 nt overhangs were annealed, phosphorylated *in vitro*, then ligated into the *BsaI*-digested DR274 plasmid (Hwang et al., 2013). gRNAs were produced as previously described (Blitz et al., 2013) using full or half-size reactions of the T7 High Yield Kit (New England Biolabs). gRNAs were purified for injection as described above for Cas9 mRNA. Two target sites within the same exon were chosen per targeted gene.

## Preparation of protein

Cas9 protein was purchased from PNA Bio. Cas9 protein was resuspended as per the manufacturer's instructions, aliquoted, and stored at  $-70^{\circ}\text{C}$ . 1  $\mu\text{g}$  Cas9 protein was incubated with 400 ng gRNA (a 2.5:1 ratio by mass) for 10 min on ice, then brought up to 5  $\mu\text{l}$  with LRD and nuclease-free water for injection (see below).

## Microinjection

Microinjections were performed in embryo system water in a room kept at  $19\text{--}20^{\circ}\text{C}$ . Embryos were injected at the 1- to 2-cell stage with  $\sim 5$  nl injection solution containing 500 or 1000 pg Cas9 mRNA, 400 or 800 pg gRNA, and 10% lysinated Rhodamine-dextran (LRD). For injections with Cas9 protein we used 400 pg *Tyr* gRNA 2 plus 1000 pg Cas9 protein. For some injections, 125 pg *GFP* mRNA was included to test for degradation of injected RNAs. Embryos were sorted by fluorescence at st. 21–26, and LRD-negative embryos were discarded.

## Phenotypic analyses of mutant embryos and larvae

To assess the efficiency of *Tyr* mutagenesis, we fixed *Tyr* gRNA+Cas9 mRNA/Cas9 protein-injected lamprey larvae at st. 30 ( $\sim 30$  days post-fertilization). Larvae were compared with wild-type siblings and scored as having: (1) wild-type pigmentation; (2)  $<50\%$  pigment reduction; (3) 50–90% pigment reduction; or (4) 90–100% pigment reduction. *FGF8/17/18* gRNA+Cas9 mRNA-injected larvae were fixed when their injected, unaffected siblings reached st. 23.5 or st. 26.5 and scored for gross morphology. Phenotypic scoring for head size (by total estimated volume) was split into five mutant classes: (1) no or almost no head, where only a small bump is visible; (2) head is highly reduced with no discernible morphological landmarks; (3) head is 50–75% of its normal volume, with visible (but reduced) first stream neural crest mesenchyme; (4) head is slightly reduced in volume, with most head characters discernible, although the upper lip is usually truncated; (5) grossly wild type in appearance. Changes in the expression of *Eng*, *Ednra*, *Sox1* and *Mef2* were visualized by *in situ* hybridization.

It should be noted that there was some variability in the severity and frequency of non-specific defects between injection batches due to differences in how eggs from different females tolerated injection. Females with particularly robust eggs showed survival and frequencies of developmental delay and deformity identical to uninjected wild-type embryos. By contrast, females with sensitive eggs showed a higher percentage of death and non-specific defects upon injection compared with their wild-type siblings. Such variation is not unexpected, given the genetic and environmental variation inherent in wild populations, and is effectively mitigated by injecting each gRNA into two or more females per season.

## Genotyping

To confirm mutagenesis, we isolated genomic DNA from gRNA+Cas9 mRNA-injected embryos and larvae as per standard methods. The target loci were amplified by PCR and ligated into the pJet1.2 vector. Genotyping primer sequences are listed in Table S1. After transformation and plating as per standard methods, single clones were amplified, purified and sequenced.

## In situ hybridization (ISH)

Riboprobe templates were amplified by PCR using primers incorporating an SP6 RNA polymerase site. Riboprobes were then synthesized with SP6 RNA polymerase, and ISH carried out as previously described (Cerny et al., 2010). ISH was performed in parallel on wild-type embryos and larvae to normalize signal development times. St. 25+ larvae probed for *Tyr* expression were bleached in  $1\times\text{SSC}/5\%$  formamide/ $1\%$   $\text{H}_2\text{O}_2$  to allow for visualization of signal in pigmented cells.

## Acknowledgements

We thank Haley Stein and Cole Steinmetz for assistance with *P. marinus* husbandry; Andrew Hansen and Kathryn Hutton for assistance with genotyping; and the anonymous reviewers whose suggestions significantly improved the work.

## Competing interests

The authors declare no competing or financial interests.

## Author contributions

D.M.M. and M.K. conceived the project. D.M.M., T.S., M.R. and D.J. designed experiments. T.S., M.R., D.J. and M.V.C. performed experiments. D.M.M., T.S. and M.R. wrote the manuscript.

## Funding

T.S., M.R., D.J., M.V.C. and D.M.M. were supported by a National Science Foundation grant [IOS1257040] to D.M.M. M.K. was supported by National Institutes of Health grant [3R01GM074746]. Deposited in PMC for release after 12 months.

## Supplementary information

Supplementary information available online at <http://dev.biologists.org/lookup/suppl/doi:10.1242/dev.125609/-/DC1>

## References

- Abzhanov, A. and Tabin, C. J. (2004). Shh and Fgf8 act synergistically to drive cartilage outgrowth during cranial development. *Dev. Biol.* **273**, 134–148.
- Barrangou, R., Fremaux, C., Deveau, H., Richards, M., Boyaval, P., Moineau, S., Romero, D. A. and Horvath, P. (2007). CRISPR provides acquired resistance against viruses in prokaryotes. *Science* **315**, 1709–1712.
- Bassett, A. R., Tibbit, C., Ponting, C. P. and Liu, J.-L. (2013). Highly efficient targeted mutagenesis of *Drosophila* with the CRISPR/Cas9 system. *Cell Rep.* **4**, 220–228.
- Beamish, F. W. H. (1980). Biology of the North American Anadromous Sea Lamprey, *Petromyzon Marinus*. *Can. J. Fish. Aquat. Sci.* **37**, 1924–1943.
- Belhaj, K., Chaparro-Garcia, A., Kamoun, S. and Nekrasov, V. (2013). Plant genome editing made easy: targeted mutagenesis in model and crop plants using the CRISPR/Cas system. *Plant Methods* **9**, 39.
- Blitz, I. L., Biesinger, J., Xie, X. and Cho, K. W. Y. (2013). Biallelic genome modification in *Xenopus tropicalis* embryos using the CRISPR/Cas system. *Genesis* **51**, 827–834.
- Cerny, R., Cattell, M., Sauka-Spengler, T., Bronner-Fraser, M., Yu, F. and Medeiros, D. M. (2010). Evidence for the prepattern/cooption model of vertebrate jaw evolution. *Proc. Natl. Acad. Sci. USA* **107**, 17262–17267.
- Close, D. A., Yun, S.-S., McCormick, S. D., Wildbill, A. J. and Li, W. (2010). 11-Deoxycortisol is a corticosteroid hormone in the lamprey. *Proc. Natl. Acad. Sci. USA* **107**, 13942–13947.
- Cong, L., Ran, F. A., Cox, D., Lin, S., Barretto, R., Habib, N., Hsu, P. D., Wu, X., Jiang, W., Marraffini, L. A. et al. (2013). Multiplex genome engineering using CRISPR/Cas systems. *Science* **339**, 819–823.
- Crump, J. G., Maves, L., Lawson, N. D., Weinstein, B. M. and Kimmel, C. B. (2004). An essential role for Fgfs in endodermal pouch formation influences later craniofacial skeletal patterning. *Development* **131**, 5703–5716.
- Doench, J. G., Hartenian, E., Graham, D. B., Tothova, Z., Hegde, M., Smith, I., Sullender, M., Ebert, B. L., Xavier, R. J. and Root, D. E. (2014). Rational design of highly active sgRNAs for CRISPR-Cas9-mediated gene inactivation. *Nat. Biotechnol.* **32**, 1262–1267.
- Flowers, G. P., Timberlake, A. T., Mclean, K. C., Monaghan, J. R. and Crews, C. M. (2014). Highly efficient targeted mutagenesis in axolotl using Cas9 RNA-guided nuclease. *Development* **141**, 2165–2171.

- Gagnon, J. A., Valen, E., Thyme, S. B., Huang, P., Ahkmetova, L., Pauli, A., Montague, T. G., Zimmermann, S., Richter, C. and Schier, A. F. (2014). Efficient mutagenesis by Cas9 protein-mediated oligonucleotide insertion and large-scale assessment of single-guide RNAs. *PLoS ONE* **9**, e98186.
- Guo, X., Zhang, T., Hu, Z., Zhang, Y., Shi, Z., Wang, Q., Cui, Y., Wang, F., Zhao, H. and Chen, Y. (2014). Efficient RNA/Cas9-mediated genome editing in *Xenopus tropicalis*. *Development* **141**, 707–714.
- Hsu, P. D., Scott, D. A., Weinstein, J. A., Ran, F. A., Konermann, S., Agarwala, V., Li, Y., Fine, E. J., Wu, X., Shalem, O. et al. (2013). DNA targeting specificity of RNA-guided Cas9 nucleases. *Nat. Biotechnol.* **31**, 827–832.
- Hwang, W. Y., Fu, Y., Reyon, D., Maeder, M. L., Tsai, S. Q., Sander, J. D., Peterson, R. T., Yeh, J.-R. J. and Joung, J. K. (2013). Efficient genome editing in zebrafish using a CRISPR-Cas system. *Nat. Biotechnol.* **31**, 227–229.
- Ikmi, A., McKinney, S. A., Delventhal, K. M. and Gibson, M. C. (2014). TALEN and CRISPR/Cas9-mediated genome editing in the early-branching metazoan *Nematostella vectensis*. *Nat. Commun.* **5**, 5486.
- Jandzik, D., Hawkins, M. B., Cattell, M. V., Cerny, R., Square, T. A. and Medeiros, D. M. (2014). Roles for FGF in lamprey pharyngeal pouch formation and skeletogenesis highlight ancestral functions in the vertebrate head. *Development* **141**, 629–638.
- Jao, L.-E., Wente, S. R. and Chen, W. (2013). Efficient multiplex biallelic zebrafish genome editing using a CRISPR nuclease system. *Proc. Natl. Acad. Sci. USA* **110**, 13904–13909.
- Lakiza, O., Miller, S., Bunce, A., Lee, E. M.-J. and McCauley, D. W. (2011). SoxE gene duplication and development of the lamprey branchial skeleton: insights into development and evolution of the neural crest. *Dev. Biol.* **359**, 149–161.
- Lo, T.-W., Pickle, C. S., Lin, S., Ralston, E. J., Gurling, M., Schartner, C. M., Bian, Q., Doudna, J. A. and Meyer, B. J. (2013). Precise and heritable genome editing in evolutionarily diverse nematodes using TALENs and CRISPR/Cas9 to engineer insertions and deletions. *Genetics* **195**, 331.
- Mali, P., Esvelt, K. M. and Church, G. M. (2013). Cas9 as a versatile tool for engineering biology. *Nat. Methods* **10**, 957–963.
- Mason, I., Chambers, D., Shamim, H., Walshe, J. and Irving, C. (2000). Regulation and function of FGF8 in patterning of midbrain and anterior hindbrain. *Biochem. Cell Biol.* **78**, 577–584.
- McCauley, D. W. and Bronner-Fraser, M. (2006). Importance of SoxE in neural crest development and the evolution of the pharynx. *Nature* **441**, 750–752.
- McCauley, D. W. and Kuratani, S. (2008). Cyclostome studies in the context of vertebrate evolution. *Zool. Sci.* **25**, 953–954.
- Nakayama, T., Fish, M. B., Fisher, M., Oomen-Hajagos, J., Thomsen, G. H. and Grainger, R. M. (2013). Simple and efficient CRISPR/Cas9-mediated targeted mutagenesis in *Xenopus tropicalis*. *Genesis* **51**, 835–843.
- Nikitina, N., Bronner-Fraser, M. and Sauka-Spengler, T. (2009). Culturing lamprey embryos. *Cold Spring Harb. Protoc.* **2009**, pdb.prot5122.
- Nikitina, N., Tong, L. and Bronner, M. E. (2011). Ancestral network module regulating *prdm1* expression in the lamprey neural plate border. *Dev. Dyn.* **240**, 2265–2271.
- Ota, K. G., Kuraku, S. and Kuratani, S. (2007). Hagfish embryology with reference to the evolution of the neural crest. *Nature* **446**, 672–675.
- Pancer, Z., Amemiya, C. T., Ehrhardt, G. R. A., Ceitlin, J., Gartland, G. L. and Cooper, M. D. (2004). Somatic diversification of variable lymphocyte receptors in the agnathan sea lamprey. *Nature* **430**, 174–180.
- Parker, H. J., Bronner, M. E. and Krumlauf, R. (2014). A Hox regulatory network of hindbrain segmentation is conserved to the base of vertebrates. *Nature* **514**, 490.
- Piavis, G. W. (1971). *The Biology of Lampreys*. London: Academic Press.
- Reifers, F., Bohl, H., Walsh, E. C., Crossley, P. H., Stainier, D. Y. R. and Brand, M. (1998). Fgf8 is mutated in zebrafish acerebellar (ace) mutants and is required for maintenance of midbrain-hindbrain boundary development and somitogenesis. *Development* **125**, 2381–2395.
- Rogozin, I. B., Wolf, Y. I., Sorokin, A. V., Mirkin, B. G. and Koonin, E. V. (2003). Remarkable interkingdom conservation of intron positions and massive, lineage-specific intron loss and gain in eukaryotic evolution. *Curr. Biol.* **13**, 1512–1517.
- Sauka-Spengler, T., Meulemans, D., Jones, M. and Bronner-Fraser, M. (2007). Ancient evolutionary origin of the neural crest gene regulatory network. *Dev. Cell* **13**, 405–420.
- Smith, J., Morgan, J. R., Zottoli, S. J., Smith, P. J., Buxbaum, J. D. and Bloom, O. E. (2011). Regeneration in the Era of functional genomics and gene network analysis. *Biol. Bull.* **221**, 18–34.
- Smith, J. J., Kuraku, S., Holt, C., Sauka-Spengler, T., Jiang, N., Campbell, M. S., Yandell, M. D., Manousaki, T., Meyer, A., Bloom, O. E. et al. (2013). Sequencing of the sea lamprey (*Petromyzon marinus*) genome provides insights into vertebrate evolution. *Nat. Genet.* **45**, 415–421.
- Sower, S. A. (2003). The endocrinology of reproduction in lampreys and applications for male lamprey sterilization. *J. Great Lakes Res.* **29**, 50–65.
- Sower, S. A., Freamat, M. and Kavanaugh, S. I. (2009). The origins of the vertebrate hypothalamic-pituitary-gonadal (HPG) and hypothalamic-pituitary-thyroid (HPT) endocrine systems: new insights from lampreys. *Gen. Comp. Endocrinol.* **161**, 20–29.
- Sun, X., Meyers, E. N., Lewandoski, M. and Martin, G. R. (1999). Targeted disruption of Fgf8 causes failure of cell migration in the gastrulating mouse embryo. *Genes Dev.* **13**, 1834–1846.
- Tahara, Y. (1988). Normal stages of development in the lamprey, *Lampetra-Reissneri* (Dybowski). *Zool. Sci.* **5**, 109–118.
- Tamura, K., Stecher, G., Peterson, D., Filipski, A. and Kumar, S. (2013). MEGA6: Molecular Evolutionary Genetics Analysis Version 6.0. *Mol. Biol. Evol.* **30**, 2725–2729.
- Wang, H., Yang, H., Shivalila, C. S., Dawlaty, M. M., Cheng, A. W., Zhang, F. and Jaenisch, R. (2013). One-step generation of mice carrying mutations in multiple genes by CRISPR/Cas-mediated genome engineering. *Cell* **153**, 910–918.
